# Supplementary material for: Co‐creation of healthier food retail environments: A systematic review to explore the type of stakeholders and their motivations and stage of engagement
Source: PubMed Central journal article supplement — Obes Rev. 2022 Jun 6;23(9):e13482. doi: 10.1111/obr.13482 (PMC9540769; doi:10.1111/obr.13482), 2022-06-06
Supplement: OBR-23-e13482-s001.pdf [file OBR-23-e13482-s001.pdf]

Vargas, C, Whelan, J, Brimblecombe, J, Brock, J, Christian, M, Allender, S. Co-creation of healthier food retail environments: a systematic review to explore the type of stakeholders, their motivations and stage of engagement.

**Corresponding author:**

Carmen Vargas

95 Eastern Beach Rd, Geelong VIC 3220

[carmen.vargas@deakin.edu.au](mailto:carmen.vargas@deakin.edu.au)

**Table S1: General description of included studies**

| Author, year of publication, and country                   | Study design, main aim, program/project name and duration of the study                                                                                                                                                                                                                                                                                | Setting description and other characteristics                                                                                                                                                                   | Participant food stores: type and ownership                                                                                                                                     | MMAT Overall Score (%) |
|------------------------------------------------------------|-------------------------------------------------------------------------------------------------------------------------------------------------------------------------------------------------------------------------------------------------------------------------------------------------------------------------------------------------------|-----------------------------------------------------------------------------------------------------------------------------------------------------------------------------------------------------------------|---------------------------------------------------------------------------------------------------------------------------------------------------------------------------------|------------------------|
| Schurman (1983) <sup>1</sup><br>Canada                     | <ul style="list-style-type: none"> <li>• Case study</li> <li>• <b>Aim:</b> to improve nutritional status in remote native communities in northern Canada.</li> <li>• HBC Nutrition Upgrading Program</li> </ul>                                                                                                                                       | <ul style="list-style-type: none"> <li>• <b>Population:</b> Inuit</li> <li>• <b>Geography/Area:</b> Remote and very remote</li> </ul>                                                                           | <ul style="list-style-type: none"> <li>○ 64 communities</li> <li>○ Community store</li> </ul>                                                                                   | 40                     |
| Light, et al., (1989) <sup>2</sup><br>United States        | <ul style="list-style-type: none"> <li>• Case-control study.</li> <li>• <b>Aim:</b> to test the feasibility of supermarkets as a site for consumer nutrition education.</li> <li>• Eat for Health</li> <li>• 12-month development and baseline data collection, 24-month interventions, and 12-month data analysis</li> </ul>                         | <ul style="list-style-type: none"> <li>• <b>Geography/Area:</b> Washington and Baltimore</li> </ul>                                                                                                             | <ul style="list-style-type: none"> <li>○ 40 Supermarkets (20 intervention and 20 comparative)</li> <li>○ Independent</li> </ul>                                                 | 40                     |
| Närhinen, et al., (1999) <sup>3</sup><br>Finland           | <ul style="list-style-type: none"> <li>• Case study.</li> <li>• <b>Aim:</b> to encourage the supermarket to take health aspects, specifically related to salt and saturated fat into consideration in their marketing</li> <li>• Healthier choice</li> <li>• 8-week intervention</li> </ul>                                                           | <ul style="list-style-type: none"> <li>• <b>Geography/Area:</b> Mikkeli</li> </ul>                                                                                                                              | <ul style="list-style-type: none"> <li>○ 1 Supermarket</li> </ul>                                                                                                               | 40                     |
| Gittelsohn, et al., (2010) <sup>4</sup><br>Canada*         | <ul style="list-style-type: none"> <li>• Case-control study</li> <li>• <b>Aim:</b> to reduce risk factors for chronic disease in Inuit communities in the Canadian Arctic.</li> <li>• The Healthy Foods North (HFN) program</li> <li>• 6-month formative research, 18-month intervention refinement and feedback, 14 -month implementation</li> </ul> | <ul style="list-style-type: none"> <li>• <b>Population:</b> Inuit</li> <li>• <b>Geography/Area:</b> remote</li> </ul>                                                                                           | <ul style="list-style-type: none"> <li>○ 3 communities (2 intervention and 1 comparative)</li> <li>○ Food stores and cooperatives</li> <li>○ Chains and cooperatives</li> </ul> | 80                     |
| Gittelsohn, et al., (2010) <sup>5</sup><br>United States** | <ul style="list-style-type: none"> <li>• Case-control study</li> <li>• <b>Aim:</b> to increase the availability of healthy foods in stores in the two intervention communities and promote healthier food choices and food preparation methods.</li> <li>• Healthy Foods Hawaii intervention</li> <li>• 8- and 10-month intervention</li> </ul>       | <ul style="list-style-type: none"> <li>• <b>Population:</b> Native Hawaiian and Pacific Islander</li> <li>• <b>Geography/Area:</b> two islands</li> <li>• <b>Other:</b> low-income level and poverty</li> </ul> | <ul style="list-style-type: none"> <li>○ 2 communities</li> <li>○ 4 Food stores</li> </ul>                                                                                      | 80                     |

| Author, year of publication, and country                | Study design, main aim, program/project name and duration of the study                                                                                                                                                                                                                                                                                                                                           | Setting description and other characteristics                                                                                                                                                          | Participant food stores: type and ownership                                                                                   | MMAT Overall Score (%) |
|---------------------------------------------------------|------------------------------------------------------------------------------------------------------------------------------------------------------------------------------------------------------------------------------------------------------------------------------------------------------------------------------------------------------------------------------------------------------------------|--------------------------------------------------------------------------------------------------------------------------------------------------------------------------------------------------------|-------------------------------------------------------------------------------------------------------------------------------|------------------------|
| Novotny, et al., (2011) <sup>6</sup><br>United States** | <ul style="list-style-type: none"> <li>• Case-control study.</li> <li>• <b>Aim:</b> to modify the food environment of rural underserved communities to shift food availability and consumption to healthier local foods, to ultimately prevent and reduce child obesity.</li> <li>• Healthy Foods Hawai'i (HFH)</li> <li>• The intervention was comprised of four phases, each running for 6-8 weeks.</li> </ul> | <ul style="list-style-type: none"> <li>• <b>Population:</b> Native Hawaiian and Pacific Islander</li> <li>• <b>Geography/Area:</b> two islands</li> <li>• <b>Other:</b> below poverty level</li> </ul> | <ul style="list-style-type: none"> <li>○ 4 Food stores (2 intervention and 2 comparative)</li> </ul>                          | 100                    |
| Kolahdooz, et al. (2014) <sup>7</sup><br>Canada*        | <ul style="list-style-type: none"> <li>• Quasi experimental study randomly selected</li> <li>• <b>Aim:</b> to reduce the risk of chronic disease by improving diet and increasing physical activity.</li> <li>• Healthy Foods North (HFN)</li> </ul>                                                                                                                                                             | <ul style="list-style-type: none"> <li>• <b>Population:</b> Inuit and Inuvialuit</li> <li>• <b>Geography/Area:</b> Remote</li> <li>• <b>Other:</b> below poverty level</li> </ul>                      | <ul style="list-style-type: none"> <li>○ 6 communities<br/>Food store</li> </ul>                                              | 100                    |
| Young, et al (2014) <sup>8</sup><br>United States       | <ul style="list-style-type: none"> <li>• Case study</li> <li>• <b>Aim:</b> to increase consumer knowledge of the importance of a healthy diet to encourage healthy food consumption.</li> <li>• 18-month intervention</li> </ul>                                                                                                                                                                                 | <ul style="list-style-type: none"> <li>• <b>Population:</b> white and African American</li> <li>• <b>Geography/area:</b> Urban</li> <li>• <b>Other:</b> unemployment and poverty</li> </ul>            | <ul style="list-style-type: none"> <li>○ 3 corner stores (one did not finish)</li> <li>○ Independent</li> </ul>               | 60                     |
| Gudzune, et al., (2015) <sup>9</sup><br>United States   | <ul style="list-style-type: none"> <li>• Pre- post- non-randomised intervention</li> <li>• <b>Aim:</b> to pilot collaborations between two urban farms with two corner stores to increase access to fresh produce in low-income neighbourhoods.</li> <li>• 9-week intervention</li> </ul>                                                                                                                        | <ul style="list-style-type: none"> <li>• <b>Geography/area:</b> urban</li> <li>• <b>Other:</b> low-income level</li> </ul>                                                                             | <ul style="list-style-type: none"> <li>○ 2 corner stores</li> </ul>                                                           | 60                     |
| Ortega, et al., (2015)<br>United States <sup>10</sup>   | <ul style="list-style-type: none"> <li>• Case-control study.</li> <li>• <b>Aim:</b> to improve the food environment by transforming corner stores so that they provide healthy food options to community residents.</li> <li>• Proyecto Mercado FRESCO</li> <li>• 2-year study</li> </ul>                                                                                                                        | <ul style="list-style-type: none"> <li>• <b>Population:</b> Latino</li> <li>• <b>Geography/Area:</b> Urban</li> <li>• <b>Other:</b> Food swamp</li> </ul>                                              | <ul style="list-style-type: none"> <li>○ 8 corner stores (4 intervention and 4 comparative)</li> <li>○ Independent</li> </ul> | 60                     |
| Pothukuchi (2016) <sup>11</sup><br>United States        | <ul style="list-style-type: none"> <li>• Case study</li> <li>• <b>Aim:</b> to determine if interventions could be developed to sustainably increase the availability and sales of fresh produce in corner stores in impoverished Detroit neighbourhoods.</li> <li>• Detroit FRESH</li> <li>• 6-year study</li> </ul>                                                                                             | <ul style="list-style-type: none"> <li>• <b>Geography/Area:</b> Detroit</li> <li>• <b>Other:</b> Impoverish neighbours with outdated infrastructure</li> </ul>                                         | <ul style="list-style-type: none"> <li>○ 15 corner and 9 convenience stores</li> <li>○ Independent and chain</li> </ul>       | 60                     |

| Author, year of publication, and country                   | Study design, main aim, program/project name and duration of the study                                                                                                                                                                                                                                                                                                                                                                                                                           | Setting description and other characteristics                                                                                                                   | Participant food stores: type and ownership                                                              | MMAT Overall Score (%) |
|------------------------------------------------------------|--------------------------------------------------------------------------------------------------------------------------------------------------------------------------------------------------------------------------------------------------------------------------------------------------------------------------------------------------------------------------------------------------------------------------------------------------------------------------------------------------|-----------------------------------------------------------------------------------------------------------------------------------------------------------------|----------------------------------------------------------------------------------------------------------|------------------------|
| Winkler, et al (2016) <sup>12</sup><br>Denmark             | <ul style="list-style-type: none"> <li>• Case-control study.</li> <li>• <b>Aim:</b> to examine consumer attitudes regarding roles and responsibilities of supermarkets in health promotion and to evaluate sales effects of a healthy checkout supermarket intervention.</li> <li>• Project SoL</li> <li>• 4-week intervention</li> </ul>                                                                                                                                                        | <ul style="list-style-type: none"> <li>• <b>Geography/Area:</b> Bornholm Island</li> </ul>                                                                      | <ul style="list-style-type: none"> <li>○ 7 supermarkets</li> <li>○ Chain (3 different groups)</li> </ul> | 80                     |
| Adjoian, et al. (2017) <sup>13</sup><br>United States      | <ul style="list-style-type: none"> <li>• Case study.</li> <li>• <b>Aim:</b> to determine whether implementing the healthy checkout could increase healthy purchases without decreasing total revenue generated from this area.</li> <li>• Shop healthy program</li> <li>• 1-month intervention</li> </ul>                                                                                                                                                                                        | <ul style="list-style-type: none"> <li>• <b>Geography/Area:</b> Urban</li> <li>• <b>Other:</b> low income, education attainment, and health outcomes</li> </ul> | <ul style="list-style-type: none"> <li>○ 3 Supermarkets</li> <li>○ Independent</li> </ul>                | 80                     |
| Brimblecombe, et al., (2017) <sup>14</sup><br>Australia    | <ul style="list-style-type: none"> <li>• Longitudinal multi-site case study</li> <li>• <b>Aim:</b> to develop and test the feasibility of a monitoring and evaluation learning approach to improve the capacity of Aboriginal and Torres Strait Islander communities, and their various service providers to influence the food system to increase availability, affordability, and accessibility of healthy food.</li> <li>• The Good Food Systems project</li> <li>• 5-year project</li> </ul> | <ul style="list-style-type: none"> <li>• <b>Population:</b> First Nations</li> <li>• <b>Geography/Area:</b> Remote</li> </ul>                                   | <ul style="list-style-type: none"> <li>○ 4 communities</li> <li>○ Food stores</li> </ul>                 | 80                     |
| Thorndike, et al (2017) <sup>15</sup><br>United States     | <ul style="list-style-type: none"> <li>• Randomised control trial</li> <li>• <b>Aim:</b> to increase the visibility and quality of fresh produce in corner stores.</li> <li>• 5-month intervention</li> </ul>                                                                                                                                                                                                                                                                                    | <ul style="list-style-type: none"> <li>• <b>Population:</b> Hispanic/Latin</li> <li>• <b>Geography/Area:</b> Urban</li> <li>• <b>Other:</b> poverty</li> </ul>  | <ul style="list-style-type: none"> <li>○ 6 corner stores</li> </ul>                                      | 100                    |
| Jernigan, et al., (2018) <sup>16</sup><br>United States*** | <ul style="list-style-type: none"> <li>• Randomised control trial</li> <li>• <b>Aim:</b> to increase vegetable and fruit intake among Native Americans living within the Chickasaw and Choctaw Nation of Oklahoma.</li> <li>• Tribal Health and Resilience in Vulnerable Environments (THRIVE)</li> <li>• 5-year study</li> </ul>                                                                                                                                                                | <ul style="list-style-type: none"> <li>• <b>Population:</b> Native Americans</li> <li>• <b>Geography/Area:</b> Regional</li> </ul>                              | <ul style="list-style-type: none"> <li>○ 8 convenience stores</li> <li>○ Community</li> </ul>            | 80                     |

| Author, year of publication, and country                        | Study design, main aim, program/project name and duration of the study                                                                                                                                                                                                                                                                                                                                   | Setting description and other characteristics                                                                                   | Participant food stores: type and ownership                                                                                         | MMAT Overall Score (%) |
|-----------------------------------------------------------------|----------------------------------------------------------------------------------------------------------------------------------------------------------------------------------------------------------------------------------------------------------------------------------------------------------------------------------------------------------------------------------------------------------|---------------------------------------------------------------------------------------------------------------------------------|-------------------------------------------------------------------------------------------------------------------------------------|------------------------|
| Young, et al., (2018) <sup>17</sup><br>United States            | <ul style="list-style-type: none"> <li>• Case study</li> <li>• <b>Aim:</b> to help corner stores sell high-quality produce by increasing supply of healthy foods and funding minor store upgrades to facilitate change.</li> <li>• Heights Healthy Corner Store Initiative</li> <li>• Two-year pilot intervention and evaluation</li> </ul>                                                              | <ul style="list-style-type: none"> <li>• <b>Population:</b> Native American</li> </ul>                                          | <ul style="list-style-type: none"> <li>○ 5 corner stores</li> </ul>                                                                 | 80                     |
| Bird Jernigan, et al., (2019) <sup>18</sup><br>United States*** | <ul style="list-style-type: none"> <li>• Cluster-controlled trial.</li> <li>• <b>Aim:</b> to assess a healthy retail intervention in Tribal convenience stores in Oklahoma.</li> <li>• <b>Program/project name:</b> Tribal Health and Resilience in Vulnerable Environments (THRIVE)</li> <li>• 5-year study</li> </ul>                                                                                  | <ul style="list-style-type: none"> <li>• <b>Population:</b> Native Americans</li> <li>• <b>Geography/Area:</b> Rural</li> </ul> | <ul style="list-style-type: none"> <li>○ 8 convenience stores (4 intervention and 4 comparative)</li> <li>○ Tribal owned</li> </ul> | 80                     |
| Brimblecombe, et al., (2020) <sup>19</sup><br>Australia         | <ul style="list-style-type: none"> <li>• Randomised control trial</li> <li>• <b>Aim:</b> to evaluate the impact of a strategy co-designed with industry to reduce merchandising of discretionary products on customer purchasing and business performance.</li> <li>• Healthy Stores 2020</li> <li>• 12-week intervention</li> </ul>                                                                     | <ul style="list-style-type: none"> <li>• <b>Population:</b> First Nations</li> <li>• <b>Geography/Area:</b> Remote</li> </ul>   | <ul style="list-style-type: none"> <li>○ 20 community stores (10 intervention and 10 comparative)</li> </ul>                        | 100                    |
| Fehring, et al., (2019) <sup>20</sup><br>Australia              | <ul style="list-style-type: none"> <li>• Case-control study.</li> <li>• <b>Aim:</b> to create supportive environments to reduce sugary drink consumption and increase water consumption by partnering with remote Aboriginal and Torres Strait Islander communities in Cape York.</li> <li>• The Healthy Communities Project for health.</li> <li>• 2-month planning, 12-month implementation</li> </ul> | <ul style="list-style-type: none"> <li>• <b>Population:</b> Aboriginal</li> <li>• <b>Geography/Area:</b> Remote</li> </ul>      | <ul style="list-style-type: none"> <li>○ 4 community stores</li> <li>○ independent</li> </ul>                                       | 80                     |
| Young, et al (2020) <sup>21</sup><br>New Zealand                | <ul style="list-style-type: none"> <li>• Case-control study</li> <li>• <b>Aim:</b> to place the healthier breakfast cereal products within each cereal segment more prominently on shelves, ideally at adult eye-level.</li> <li>• 36-week pilot intervention trial: 12-week baseline, 12-week intervention, 12-week follow-up</li> </ul>                                                                | <ul style="list-style-type: none"> <li>• <b>Geography/Area:</b> Urban</li> <li>• <b>Other:</b> low- to high-income</li> </ul>   | <ul style="list-style-type: none"> <li>○ 6 supermarkets (3 intervention and 3 comparative)</li> <li>○ Chain</li> </ul>              | 100                    |
| Bogomolova, et al., (2021) <sup>22</sup><br>Australia           | <ul style="list-style-type: none"> <li>• Case study</li> <li>• <b>Aim:</b> to map out and examine the process of co-designing and implementing a programme that encourages healthier choices in a real supermarket.</li> </ul>                                                                                                                                                                           | <ul style="list-style-type: none"> <li>• <b>Geography/Area:</b> Urban</li> </ul>                                                | <ul style="list-style-type: none"> <li>○ 1 supermarket</li> <li>○ Independent</li> </ul>                                            | 60                     |

| Author, year of publication, and country             | Study design, main aim, program/project name and duration of the study                                                                                                                                                                                                                                                                                               | Setting description and other characteristics                                                                                                                       | Participant food stores: type and ownership                          | MMAT Overall Score (%) |
|------------------------------------------------------|----------------------------------------------------------------------------------------------------------------------------------------------------------------------------------------------------------------------------------------------------------------------------------------------------------------------------------------------------------------------|---------------------------------------------------------------------------------------------------------------------------------------------------------------------|----------------------------------------------------------------------|------------------------|
| Rollins, et al (2021) <sup>23</sup><br>United States | <p>To evaluate the effectiveness of a co-designed programme for improving the healthfulness of food choices in a real supermarket.</p> <ul style="list-style-type: none"> <li>• Mix-methods</li> <li>• <b>Aim:</b> To increase access to healthy foods in a south Metropolitan Atlanta community.</li> <li>• The REACH-HI Healthy Corner Store Initiative</li> </ul> | <ul style="list-style-type: none"> <li>• <b>Population:</b> African American</li> <li>• <b>Geography/Area:</b> Urban</li> <li>• <b>Other:</b> low-income</li> </ul> | <ul style="list-style-type: none"> <li>○ 11 corner stores</li> </ul> | 60                     |

**Table S2: Quality appraisal of included studies**

| First author, year of publication | S1 | S2 | 1.2 | 1.2 | 1.3 | 1.4 | 1.5 | 2.1 | 2.2 | 2.3 | 2.4 | 2.5 | 3.1 | 3.2 | 3.3 | 3.4 | 3.5 | 4.1 | 4.2 | 4.3 | 4.4 | 4.5 | 5.1 | 5.2 | 5.3 | 5.4 | 5.5 | Overall score (%) |
|-----------------------------------|----|----|-----|-----|-----|-----|-----|-----|-----|-----|-----|-----|-----|-----|-----|-----|-----|-----|-----|-----|-----|-----|-----|-----|-----|-----|-----|-------------------|
| Schurman (1983)                   | Y  | Y  | Y   | N   | Y   | N   | ?   |     |     |     |     |     |     |     |     |     |     |     |     |     |     |     |     |     |     |     |     | 40                |
| Light, et al., (1989)             | Y  | Y  |     |     |     |     |     |     |     |     |     |     | ?   | Y   | N   | Y   | ?   |     |     |     |     |     |     |     |     |     |     | 40                |
| Närhinen, et al., (1999)          | Y  | Y  |     |     |     |     |     |     |     |     |     |     | Y   | ?   | Y   | N   | N   |     |     |     |     |     |     |     |     |     |     | 40                |
| Gittelsohn, et al., (2010)        | Y  | Y  |     |     |     |     |     |     |     |     |     |     | Y   | Y   | Y   | Y   | ?   |     |     |     |     |     |     |     |     |     |     | 80                |
| Gittelsohn, et al., (2010)        | Y  | Y  |     |     |     |     |     |     |     |     |     |     | Y   | Y   | Y   | Y   | ?   |     |     |     |     |     |     |     |     |     |     | 80                |
| Novotny, et al., (2011)           | Y  | Y  |     |     |     |     |     |     |     |     |     |     | Y   | Y   | Y   | Y   | Y   |     |     |     |     |     |     |     |     |     |     | 100               |
| Kolahdooz, et al. (2014)          | Y  | Y  |     |     |     |     |     | Y   | Y   | Y   | Y   | Y   |     |     |     |     |     |     |     |     |     |     |     |     |     |     |     | 100               |
| Young, et al (2014)               | Y  | Y  |     |     |     |     |     |     |     |     |     |     | Y   | Y   | Y   | N   | ?   |     |     |     |     |     |     |     |     |     |     | 60                |
| Gudzune, et al., (2015)           | Y  | Y  |     |     |     |     |     |     |     |     |     |     | N   | Y   | Y   | Y   | N   |     |     |     |     |     |     |     |     |     |     | 60                |
| Ortega, et al., (2015)            | Y  | Y  |     |     |     |     |     |     |     |     |     |     | Y   | Y   | Y   | N   | ?   |     |     |     |     |     |     |     |     |     |     | 60                |
| Pothukuchi 2016)                  | Y  | Y  | Y   | Y   | Y   | N   | ?   |     |     |     |     |     |     |     |     |     |     |     |     |     |     |     |     |     |     |     |     | 60                |

| <b>First author, year of publication</b> | <b>S1</b> | <b>S2</b> | <b>1.2</b> | <b>1.2</b> | <b>1.3</b> | <b>1.4</b> | <b>1.5</b> | <b>2.1</b> | <b>2.2</b> | <b>2.3</b> | <b>2.4</b> | <b>2.5</b> | <b>3.1</b> | <b>3.2</b> | <b>3.3</b> | <b>3.4</b> | <b>3.5</b> | <b>4.1</b> | <b>4.2</b> | <b>4.3</b> | <b>4.4</b> | <b>4.5</b> | <b>5.1</b> | <b>5.2</b> | <b>5.3</b> | <b>5.4</b> | <b>5.5</b> | <b>Overall score (%)</b> |
|------------------------------------------|-----------|-----------|------------|------------|------------|------------|------------|------------|------------|------------|------------|------------|------------|------------|------------|------------|------------|------------|------------|------------|------------|------------|------------|------------|------------|------------|------------|--------------------------|
| Winkler, et al (2016)                    | Y         | Y         |            |            |            |            |            |            |            |            |            |            | ?          | Y          | Y          | Y          | Y          |            |            |            |            |            |            |            |            |            |            | 80                       |
| Adjoian, et al. (2017)                   | Y         | Y         |            |            |            |            |            |            |            |            |            |            | Y          | Y          | Y          | ?          | Y          |            |            |            |            |            |            |            |            |            |            | 80                       |
| Brimblecombe, et al., (2017)             | Y         | Y         |            |            |            |            |            |            |            |            |            |            |            |            |            |            |            | Y          | Y          | Y          | ?          | Y          |            |            |            |            |            | 80                       |
| Thorndike, et al (2017)                  | Y         | Y         |            |            |            |            |            | Y          | Y          | Y          | Y          | Y          |            |            |            |            |            |            |            |            |            |            |            |            |            |            |            | 100                      |
| Jernigan, et al., (2018)                 | Y         | Y         |            |            |            |            |            | Y          | Y          | Y          | ?          | Y          |            |            |            |            |            |            |            |            |            |            |            |            |            |            |            | 80                       |
| Young, et al., (2018)                    | Y         | Y         |            |            |            |            |            |            |            |            |            |            | Y          | ?          | Y          | Y          | Y          |            |            |            |            |            |            |            |            |            |            | 80                       |
| Bird Jernigan, et al., (2019)            | Y         | Y         |            |            |            |            |            |            |            |            |            |            | Y          | Y          | Y          | Y          | ?          |            |            |            |            |            |            |            |            |            |            | 80                       |
| Fehring, et al., (2019)                  | Y         | Y         |            |            |            |            |            |            |            |            |            |            | ?          | Y          | Y          | Y          | Y          |            |            |            |            |            |            |            |            |            |            | 80                       |
| Brimblecombe, et al., (2020)             | Y         | Y         |            |            |            |            |            | Y          | Y          | Y          | Y          | Y          |            |            |            |            |            |            |            |            |            |            |            |            |            |            |            | 100                      |
| Young, et al (2020)                      | Y         | Y         |            |            |            |            |            |            |            |            |            |            | Y          | Y          | Y          | Y          | Y          |            |            |            |            |            |            |            |            |            |            | 100                      |
| Bogomolova, et al., (2021)               | Y         | Y         |            |            |            |            |            |            |            |            |            |            | Y          | Y          | Y          | ?          | ?          |            |            |            |            |            |            |            |            |            |            | 60                       |
| Rollins, et al 2021)                     | Y         | Y         | Y          | Y          | Y          | N          | N          |            |            |            |            |            | N          | Y          | Y          | Y          | N          |            |            |            |            |            | Y          | Y          | Y          | ?          | N          | 60                       |



**Table S3: Mixed methods appraisal tool (MMAT) criteria**

| Category of study designs                      | Methodological quality criteria                                                                                                                                                                                                    |
|------------------------------------------------|------------------------------------------------------------------------------------------------------------------------------------------------------------------------------------------------------------------------------------|
| Screening questions (for all types)            | S1. Is there a clear qualitative and/or quantitative research question (or research objective)?                                                                                                                                    |
|                                                | S2. Do the collected data allow answering (meeting) the research question (objective)? E.g., consider whether the follow-up period was long enough for the outcome to occur (concerning longitudinal studies or study components). |
| 1. Qualitative                                 | 1.1. Is the qualitative approach appropriate to answer the research question?                                                                                                                                                      |
|                                                | 1.2. Are the qualitative data collection methods adequate to address the research question?                                                                                                                                        |
|                                                | 1.3. Are the findings adequately derived from the data?                                                                                                                                                                            |
|                                                | 1.4. Is the interpretation of results sufficiently substantiated by data?                                                                                                                                                          |
|                                                | 1.5. Is there coherence between qualitative data sources, collection, analysis and interpretation?                                                                                                                                 |
| 2. Quantitative randomized controlled (trials) | 2.1. Is randomization appropriately performed?                                                                                                                                                                                     |
|                                                | 2.2. Are the groups comparable at baseline?                                                                                                                                                                                        |
|                                                | 2.3. Are there complete outcome data?                                                                                                                                                                                              |
|                                                | 2.4. Are outcome assessors blinded to the intervention provided?                                                                                                                                                                   |
|                                                | 2.5. Did the participants adhere to the assigned intervention?                                                                                                                                                                     |
| 3. Quantitative non-randomized                 | 3.1. Are the participants representative of the target population?                                                                                                                                                                 |
|                                                | 3.2. Are measurements appropriate regarding both the outcome and intervention (or exposure)?                                                                                                                                       |
|                                                | 3.3. Are there complete outcome data?                                                                                                                                                                                              |
|                                                | 3.4. Are the confounders accounted for in the design and analysis?                                                                                                                                                                 |
|                                                | 3.5. During the study period, is the intervention administered (or exposure occurred) as intended?                                                                                                                                 |
| 4. Quantitative descriptive studies            | 4.1. Is the sampling strategy relevant to address the research question?                                                                                                                                                           |
|                                                | 4.2. Is the sample representative of the target population?                                                                                                                                                                        |
|                                                | 4.3. Are the measurements appropriate?                                                                                                                                                                                             |
|                                                | 4.4. Is the risk of nonresponse bias low?                                                                                                                                                                                          |
|                                                | 4.5. Is the statistical analysis appropriate to answer the research question?                                                                                                                                                      |
| 5. Mixed methods                               | 5.1. Is there an adequate rationale for using a mixed methods design to address the research question?                                                                                                                             |
|                                                | 5.2. Are the different components of the study effectively integrated to answer the research question?                                                                                                                             |
|                                                | 5.3. Are the outputs of the integration of qualitative and quantitative components adequately interpreted?                                                                                                                         |
|                                                | 5.4. Are divergences and inconsistencies between quantitative and qualitative results adequately addressed?                                                                                                                        |
|                                                | 5.5. Do the different components of the study adhere to the quality criteria of each tradition of the methods involved?                                                                                                            |

Reference: Hong QN, Pluye P, Fàbregues S, Bartlett G, Boardman F, Cargo M, *et al.* Mixed Methods Appraisal Tool: User guide 2018. Retrieved on [21 January 2021] from: [http://mixedmethodsappraisaltoolpublic.pbworks.com/w/file/attach/127916259/MMAT\\_2018\\_criteria-manual\\_2018-08-01\\_ENG.pdf](http://mixedmethodsappraisaltoolpublic.pbworks.com/w/file/attach/127916259/MMAT_2018_criteria-manual_2018-08-01_ENG.pdf).

**Table S4: Author's Reflections and recommendations**

| Themes and subthemes                                                                                                                                                  | Examples extracted from text                                                                                                                                                                                                                                                                                                                                                                                                                                                                                                                                                                                                                                                                 |
|-----------------------------------------------------------------------------------------------------------------------------------------------------------------------|----------------------------------------------------------------------------------------------------------------------------------------------------------------------------------------------------------------------------------------------------------------------------------------------------------------------------------------------------------------------------------------------------------------------------------------------------------------------------------------------------------------------------------------------------------------------------------------------------------------------------------------------------------------------------------------------|
| <ul style="list-style-type: none"> <li>○ Enhancement:</li> <li>○ implementation<sup>1, 2, 6, 9, 10, 17, 20, 22</sup></li> <li>○ design<sup>4, 14, 20</sup></li> </ul> | <ul style="list-style-type: none"> <li>○ A major element of the <i>Eat for Health</i> study was its collaborative nature, with joint planning, development, and management.<sup>2</sup></li> <li>○ The development of HFN purposefully emphasized stakeholder involvement through formative research, small group presentations, community workshops, and training as a means of understanding the needs of the target population, addressing them in a culturally relevant manner, encouraging participation, and building consensus among stakeholders.<sup>4</sup></li> </ul>                                                                                                             |
| <ul style="list-style-type: none"> <li>○ Empowerment:</li> <li>○ community<sup>4, 10, 19, 22, 23</sup></li> <li>○ retailers<sup>3, 22</sup></li> </ul>                | <ul style="list-style-type: none"> <li>○ Three main facilitators for a successful store conversion. 1) strong community involvement through all phases of the intervention; 2) Include a partner that understands the business; 3) capacity building and social marketing as patrons' drivers for collaboration.<sup>10</sup></li> <li>○ Staff's perspective needs to be actively considered as staff offer much-needed expertise in the feasibility aspect of any new programme ideas.<sup>22</sup><br/>During the intervention it was important give autonomy to the supermarket's management to apply new ideas, instead of strictly keeping to the original plan.<sup>3</sup></li> </ul> |
| <ul style="list-style-type: none"> <li>○ Impacts on project sustainability<sup>6, 14, 21</sup></li> </ul>                                                             | <ul style="list-style-type: none"> <li>○ Working with multiple stakeholders is challenging, however, the integration of community-based organizations into intervention delivery enhanced implementation and likelihood of sustainability.<sup>6</sup></li> </ul>                                                                                                                                                                                                                                                                                                                                                                                                                            |

**Reflections**

| Themes and subthemes                                                                                                                                                                                                                                                 | Examples extracted from text                                                                                                                                                                                                                                                                                                                                                                                                                                                                                                                                                                                                                                                                                                                                                                                                                   |
|----------------------------------------------------------------------------------------------------------------------------------------------------------------------------------------------------------------------------------------------------------------------|------------------------------------------------------------------------------------------------------------------------------------------------------------------------------------------------------------------------------------------------------------------------------------------------------------------------------------------------------------------------------------------------------------------------------------------------------------------------------------------------------------------------------------------------------------------------------------------------------------------------------------------------------------------------------------------------------------------------------------------------------------------------------------------------------------------------------------------------|
| <ul style="list-style-type: none"> <li>○ Strength of relationships:               <ul style="list-style-type: none"> <li>○ community<sup>17</sup></li> <li>○ between sectors<sup>18, 19, 21</sup></li> </ul> </li> <li>○ growing partnerships<sup>3</sup></li> </ul> | <ul style="list-style-type: none"> <li>○ Un expected outcomes included improved connections to community members and customer's increased knowledge of fresh produce.<sup>17</sup></li> <li>○ This study used co-design to enhance the likely fiscal sustainability of the intervention. This process allowed a strong working relationship to be built with the retail partner, which facilitated intervention delivery, access to sales and promotional data, and possible future research opportunities.<sup>21</sup></li> <li>○ The project promoted new partnerships (voluntary heart health organisation and the supermarket). The municipal food control authority served as a bridge between them. This study was thought useful to test the possibility of co-operation between food control and supermarkets.<sup>3</sup></li> </ul> |
| <ul style="list-style-type: none"> <li>○ Prolonged time for the intervention<sup>5, 14, 22</sup></li> </ul>                                                                                                                                                          | <ul style="list-style-type: none"> <li>○ A more intense program of longer duration, supported by policy changes, would likely have broader impacts.<sup>5</sup></li> </ul>                                                                                                                                                                                                                                                                                                                                                                                                                                                                                                                                                                                                                                                                     |
| <ul style="list-style-type: none"> <li>○ Extended stakeholders' diversity<sup>5, 7, 14, 17</sup></li> </ul>                                                                                                                                                          | <ul style="list-style-type: none"> <li>○ There is greater possibility for sustainability if the programs partner with community-based institutions such as schools and stores.<sup>7</sup></li> </ul>                                                                                                                                                                                                                                                                                                                                                                                                                                                                                                                                                                                                                                          |
| <ul style="list-style-type: none"> <li>○ Greater capacity building<sup>10, 13, 17</sup></li> </ul>                                                                                                                                                                   | <ul style="list-style-type: none"> <li>○ This type of intervention might be unsustainable in a long term as checkout lines are often stocked by snack vendors or ongoing staff training on healthy products might be needed.<sup>13</sup></li> </ul>                                                                                                                                                                                                                                                                                                                                                                                                                                                                                                                                                                                           |
| <ul style="list-style-type: none"> <li>○ Specific conditions of the setting<sup>5, 6, 8, 9, 16</sup></li> </ul>                                                                                                                                                      | <ul style="list-style-type: none"> <li>○ Setting infrastructure and local promotion are two influential factors for success.<sup>9</sup></li> </ul>                                                                                                                                                                                                                                                                                                                                                                                                                                                                                                                                                                                                                                                                                            |
| <ul style="list-style-type: none"> <li>○ Policy support<sup>5, 15</sup></li> </ul>                                                                                                                                                                                   | <ul style="list-style-type: none"> <li>○ In the future, the US Department of Agriculture might consider requiring WIC- and SNAP-certified stores to display fruits/vegetables at the front of the stores</li> </ul>                                                                                                                                                                                                                                                                                                                                                                                                                                                                                                                                                                                                                            |

**Recommendations**

**Themes and subthemes**

**Examples extracted from text**

---

|                                                 |                                                                                                                                                                                                                                                                                                          |
|-------------------------------------------------|----------------------------------------------------------------------------------------------------------------------------------------------------------------------------------------------------------------------------------------------------------------------------------------------------------|
|                                                 | and to provide education for store owners about stocking and maintaining fresh produce. <sup>15</sup>                                                                                                                                                                                                    |
| ○ More intensive programs <sup>10, 22</sup>     | ○ Future programmes should cover more SKUs and product categories to guide more shoppers more often. Running programme elements in several waves to refresh and revive shoppers' experiences, while ensuring strong continuity in the whole programme and fidelity to original objectives. <sup>22</sup> |
| ○ Consideration of business needs <sup>17</sup> | ○ Addressing structural factors within business practices is critical to project success. <sup>17</sup>                                                                                                                                                                                                  |

---

## References

- 1 Schurman M. Community teamwork in nutrition education: an example in Canada's north. *Hum Nutr Appl Nutr.* 1983; 37 A: 172-9.
- 2 Light L, Tenney J, Portnoy B, Kessler L, Rodgers AB, Patterson B, *et al.* Eat for health: a nutrition and cancer control supermarket intervention. *Public Health Rep.* 1989; 104: 443-50.
- 3 Närhinen M, Nissinen A, Puska P. Healthier choices in a supermarket: the municipal food control can promote health. *Br Food J.* 1999; 101: 99-107.
- 4 Gittelsohn J, Roache C, Kratzmann M, Reid R, Ogina J, Sharma S. Participatory research for chronic disease prevention in Inuit communities. *Am J Health Behav.* 2010; 34: 453-64.
- 5 Gittelsohn J, Vijayadeva V, Davison N, Ramirez V, Cheung LWK, Murphy S, *et al.* A food store intervention trial improves caregiver psychosocial factors and childrens dietary intake in Hawaii. *Obesity.* 2010; 18: S84-S90.
- 6 Novotny R, Vijayadeva V, Ramirez V, Lee SK, Davison N, Gittelsohn J. Development and implementation of a food system intervention to prevent childhood obesity in rural Hawai'i. *Hawaii Med J.* 2011; 70: 42-6.
- 7 Kolahdooz F, Pakseresht M, Mead E, Beck L, Corriveau A, Sharma S. Impact of the Healthy Foods North nutrition intervention program on Inuit and Inuvialuit food consumption and preparation methods in Canadian Arctic communities. *Nutr J.* 2014; 13: 68-68.
- 8 Young KA, Clark JK. Examination of the strategy, instruments, and measurements used to evaluate a healthy corner store intervention. *J Hunger Environ Nutr.* 2014; 9: 449-70.
- 9 Gudzone KA, Welsh C, Lane E, Chissell Z, Anderson Steeves E, Gittelsohn J. Increasing access to fresh produce by pairing urban farms with corner stores: a case study in a low-income urban setting. *Public Health Nutr.* 2015; 18: 2770-4.
- 10 Ortega A, Albert S, Sharif M, Langellier B, Garcia R, Glik D, *et al.* Proyecto MercadoFRESCO: A Multi-level, Community-Engaged Corner Store Intervention in East Los Angeles and Boyle Heights. *J Community Health.* 2015; 40: 347-56.
- 11 Pothukuchi K. Bringing fresh produce to corner stores in declining neighborhoods: reflections from Detroit FRESH. *J Agric Food Syst Community Dev.* 2016; 7: 113-34.
- 12 Winkler LL, Christensen U, Glümer C, Bloch P, Mikkelsen BE, Wansink B, *et al.* Substituting sugar confectionery with fruit and healthy snacks at checkout - a win-win

strategy for consumers and food stores? a study on consumer attitudes and sales effects of a healthy supermarket intervention. *BMC Public Health*. 2016; 16: 1184.

13 Adjoian T, Dannefer R, Willingham C, Brathwaite C, Franklin S. Healthy Checkout Lines: A Study in Urban Supermarkets. *J Nutr Educ Behav*. 2017; 49: 615-22.

14 Brimblecombe J, Bailie R, van den Boogaard C, Wood B, Liberato SC, Ferguson M, *et al*. Feasibility of a novel participatory multi-sector continuous improvement approach to enhance food security in remote Indigenous Australian communities. *SSM Popul Health*. 2017; 3: 566-76.

15 Thorndike AN, Bright OJM, Dimond MA, Fishman R, Levy DE. Choice architecture to promote fruit and vegetable purchases by families participating in the Special Supplemental Program for Women, Infants, and Children (WIC): randomized corner store pilot study. *Public Health Nutr*. 2017; 20: 1297-305.

16 Jernigan VBB, Williams M, Wetherill M, Taniguchi T, Jacob T, Cannady T, *et al*. Using community-based participatory research to develop healthy retail strategies in Native American-owned convenience stores: The THRIVE study. *Prev Med Rep*. 2018; 11: 148-53.

17 Young S, DeNomie M, Sabir J, Gass E, Tobin J. Around the Corner to Better Health: A Milwaukee Corner Store Initiative. *Am J Health Promot*. 2018; 32: 1353-6.

18 Bird Jernigan VB, Salvatore AL, Williams M, Wetherill M, Taniguchi T, Jacob T, *et al*. A Healthy Retail Intervention in Native American Convenience Stores: The THRIVE Community-Based Participatory Research Study. *Am J Public Health*. 2019; 109: 132-9.

19 Brimblecombe J, McMahon E, Ferguson M, De Silva K, Peeters A, Miles E, *et al*. Effect of restricted retail merchandising of discretionary food and beverages on population diet: a pragmatic randomised controlled trial. *Lancet Planet Health*. 2020; 4: e463-73.

20 Fehring E, Ferguson M, Brown C, Murtha K, Laws C, Cuthbert K, *et al*. Supporting healthy drink choices in remote Aboriginal and Torres Strait Islander communities: a community-led supportive environment approach. *Aust N Z J Public Health*. 2019; 43: 551-57.

21 Young L, Rosin M, Jiang Y, Grey J, Vandevijvere S, Waterlander W, *et al*. The effect of a shelf placement intervention on sales of healthier and less healthy breakfast cereals in supermarkets: A co-designed pilot study. *Soc Sci Med*. 2020; 266: 113337.

22 Bogomolova S, Carins J, Dietrich T, Bogomolov T, Dollman J. Encouraging healthier choices in supermarkets: a co-design approach. *Eur J Mark*. 2021; 55: 2439–63.

23 Rollins L, Carey T, Proeller A, Anne Adams M, Hooker M, Lyn R, *et al.*  
Community-Based Participatory Approach to Increase African Americans' Access to  
Healthy Foods in Atlanta, GA. *J Community Health*. 2021; 46: 41-50.
